# Supplementary material
Source: PubMed Central journal article supplement (PMC5291802)
Supplement: NIHMS834476-supplement.pdf [file NIHMS834476-supplement.pdf]

Figure S1, related to main Figure 2

A

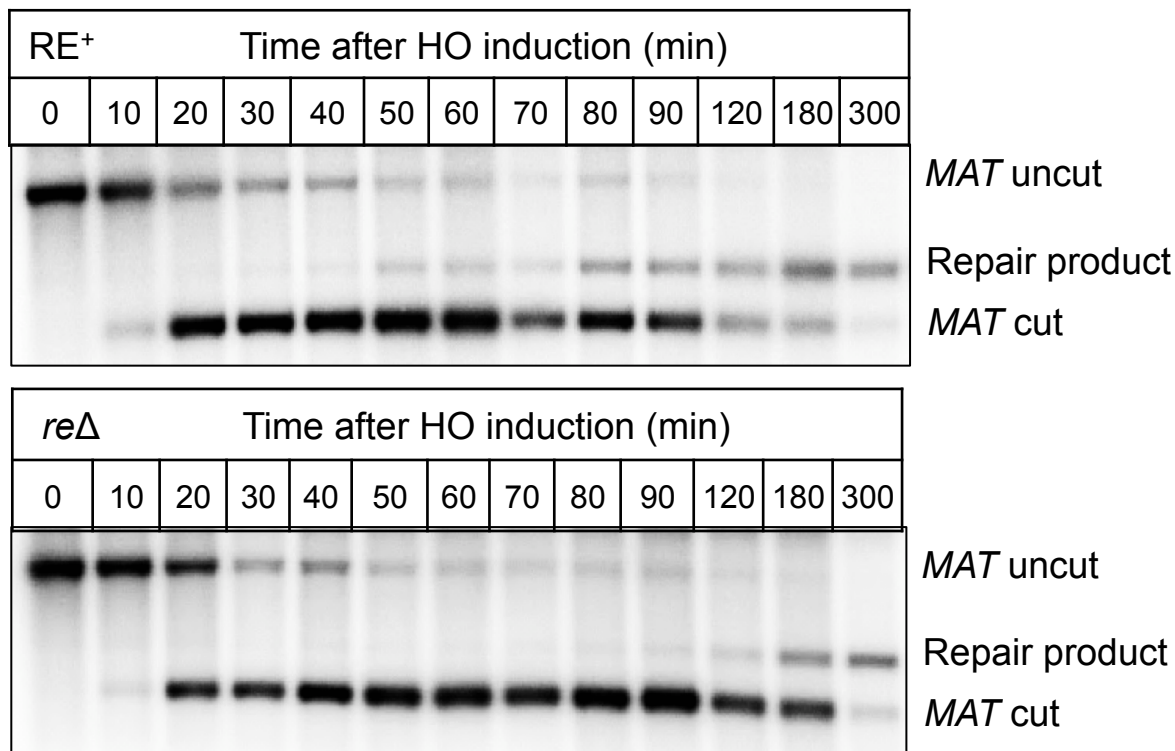

B

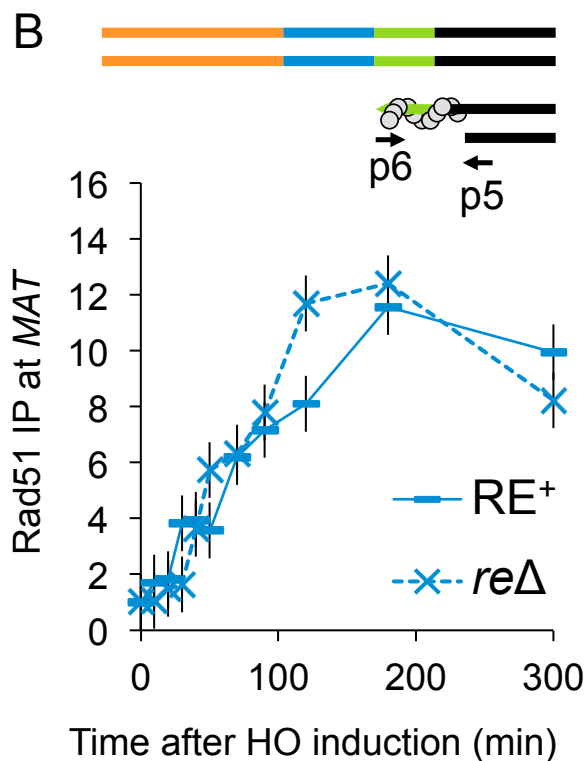

C

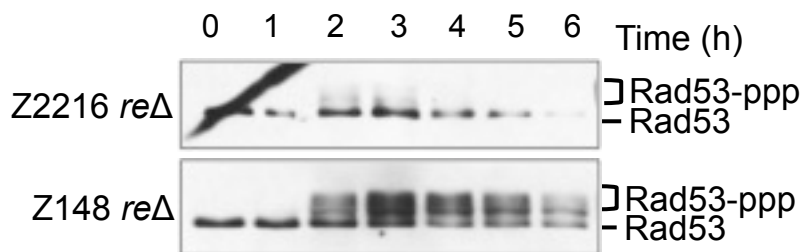

Figure S2, related to main Figure 4

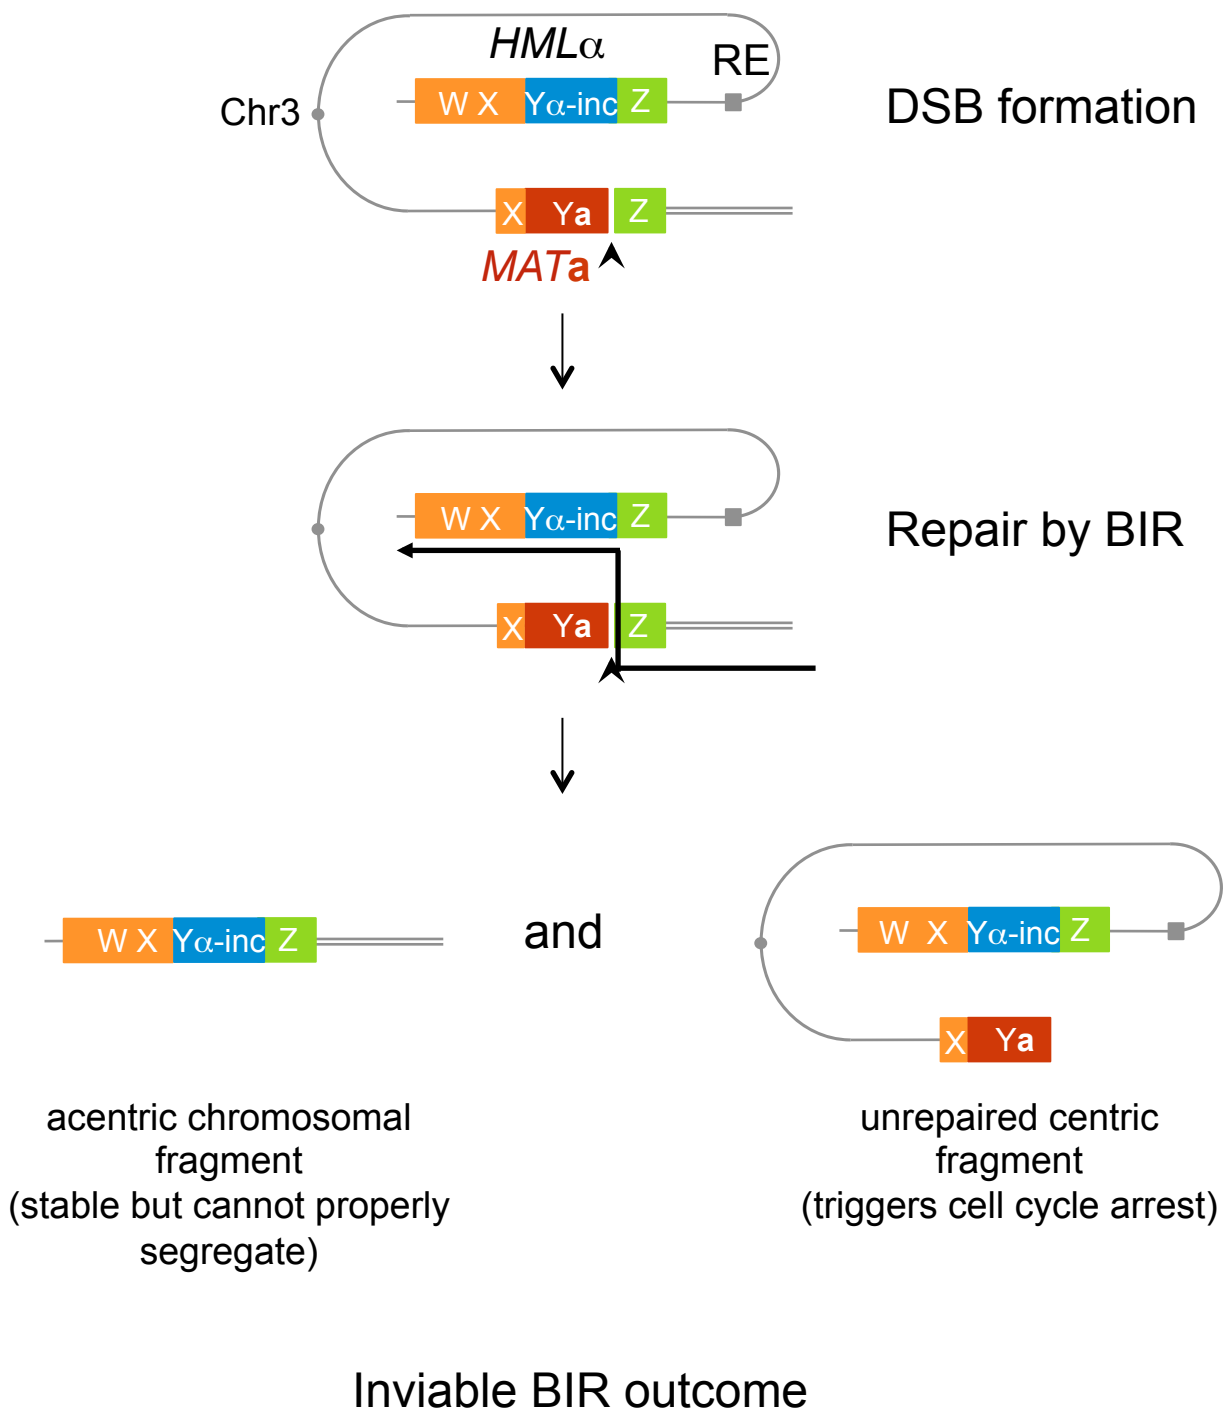

Figure S3, related to main Figure 4 and Figure 5

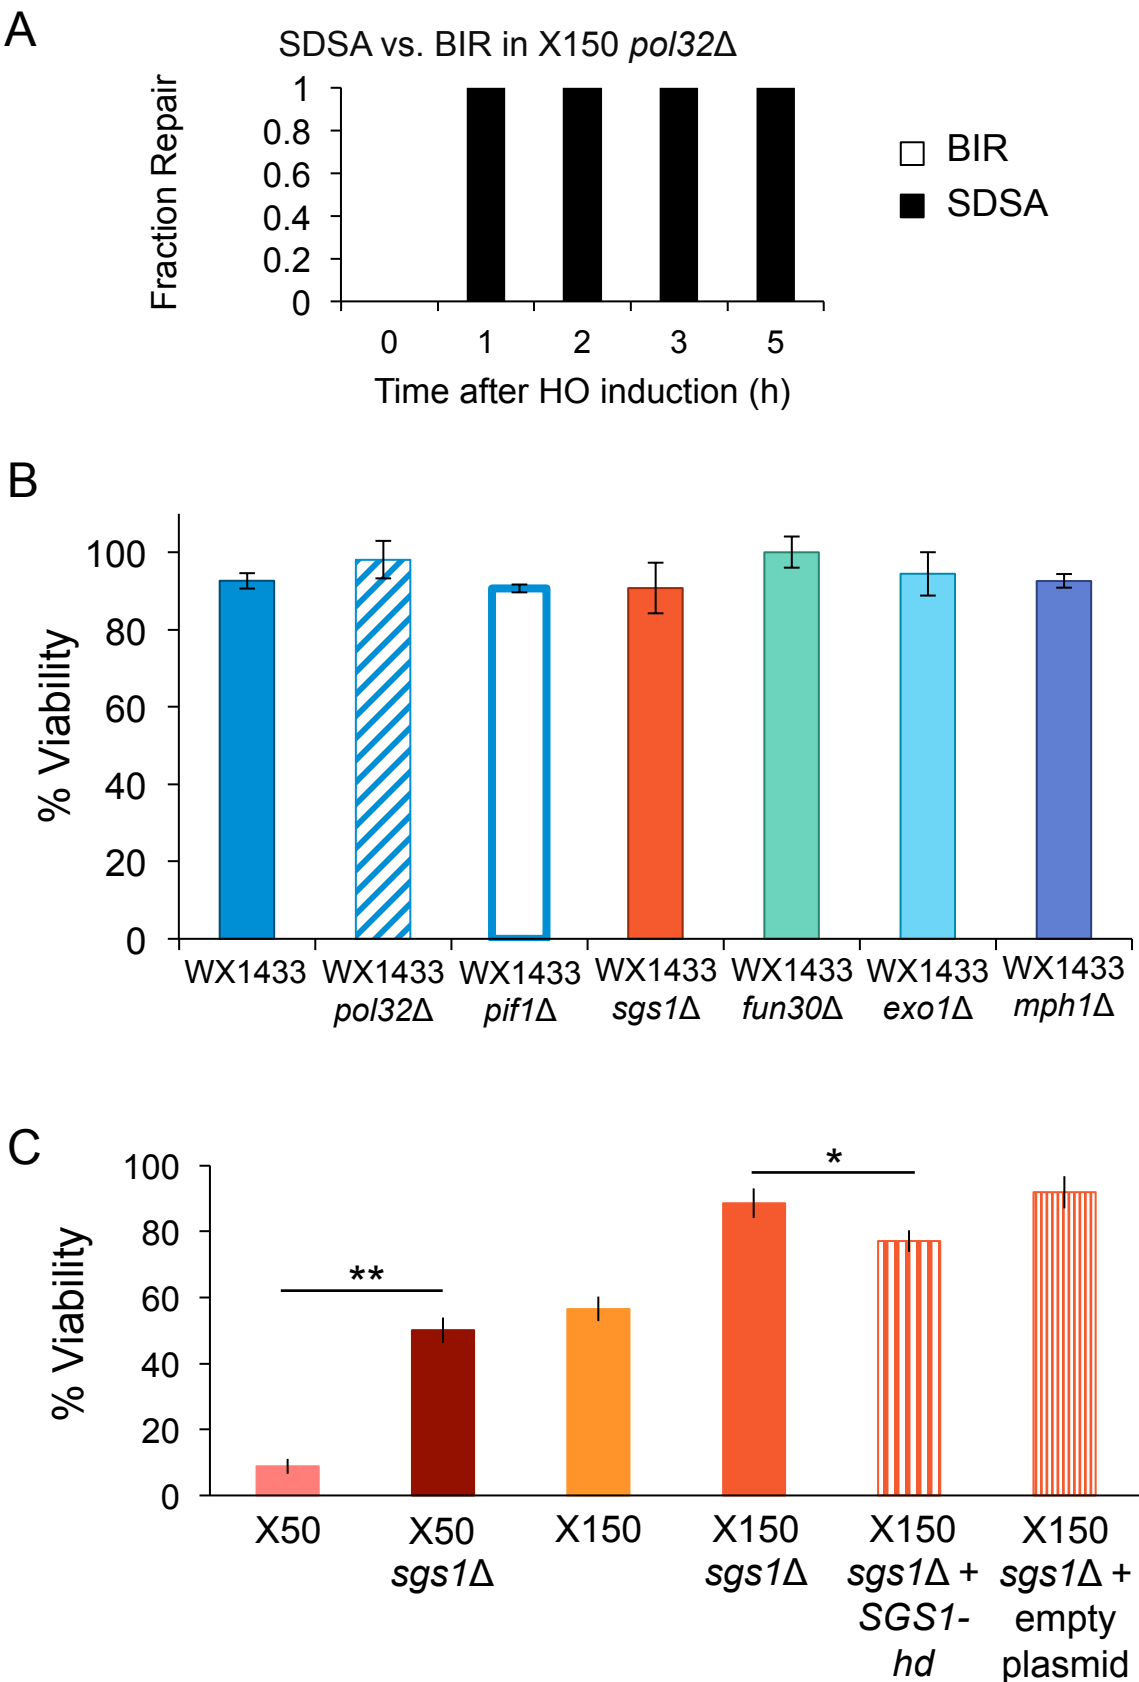

Figure S4, related to main Figure 4 and Figure 5

A

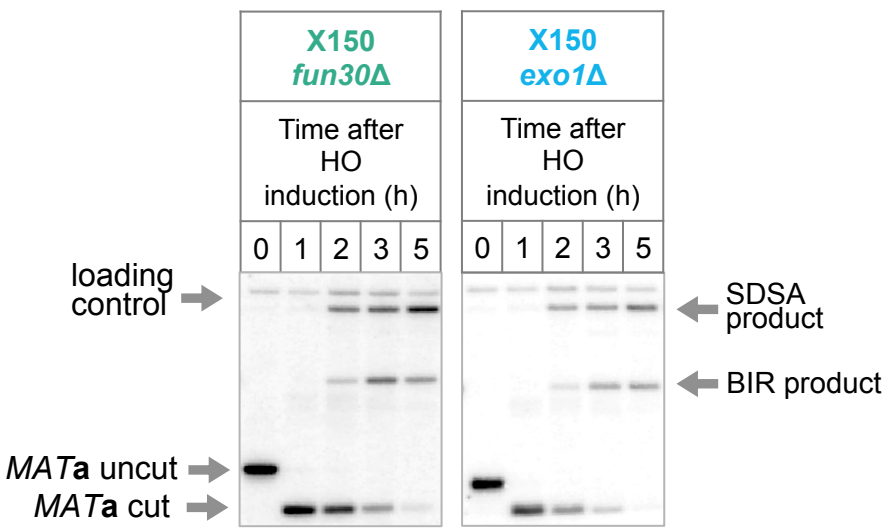

B

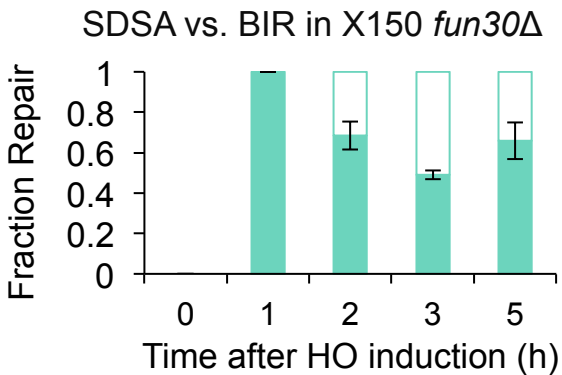

C

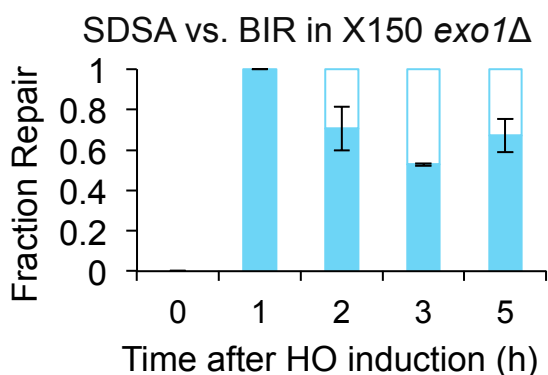

D

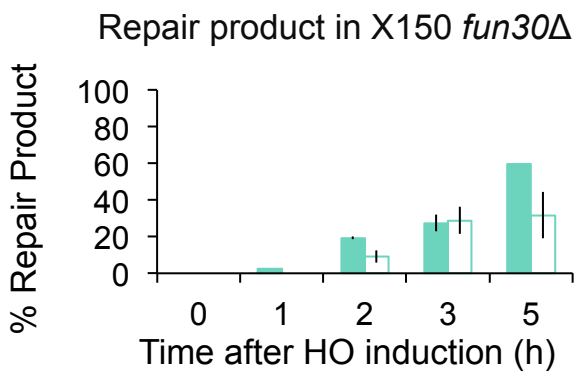

E

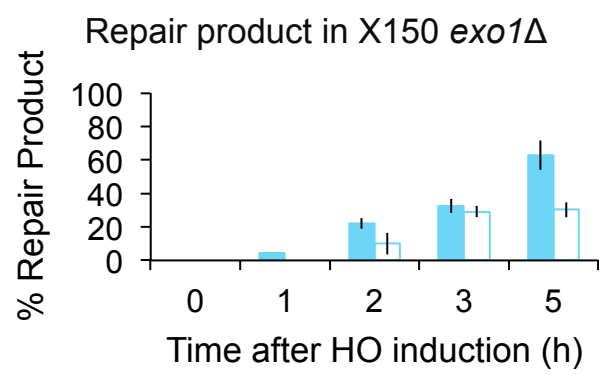

Figure S5, related to main Figure 4 and Figure 5

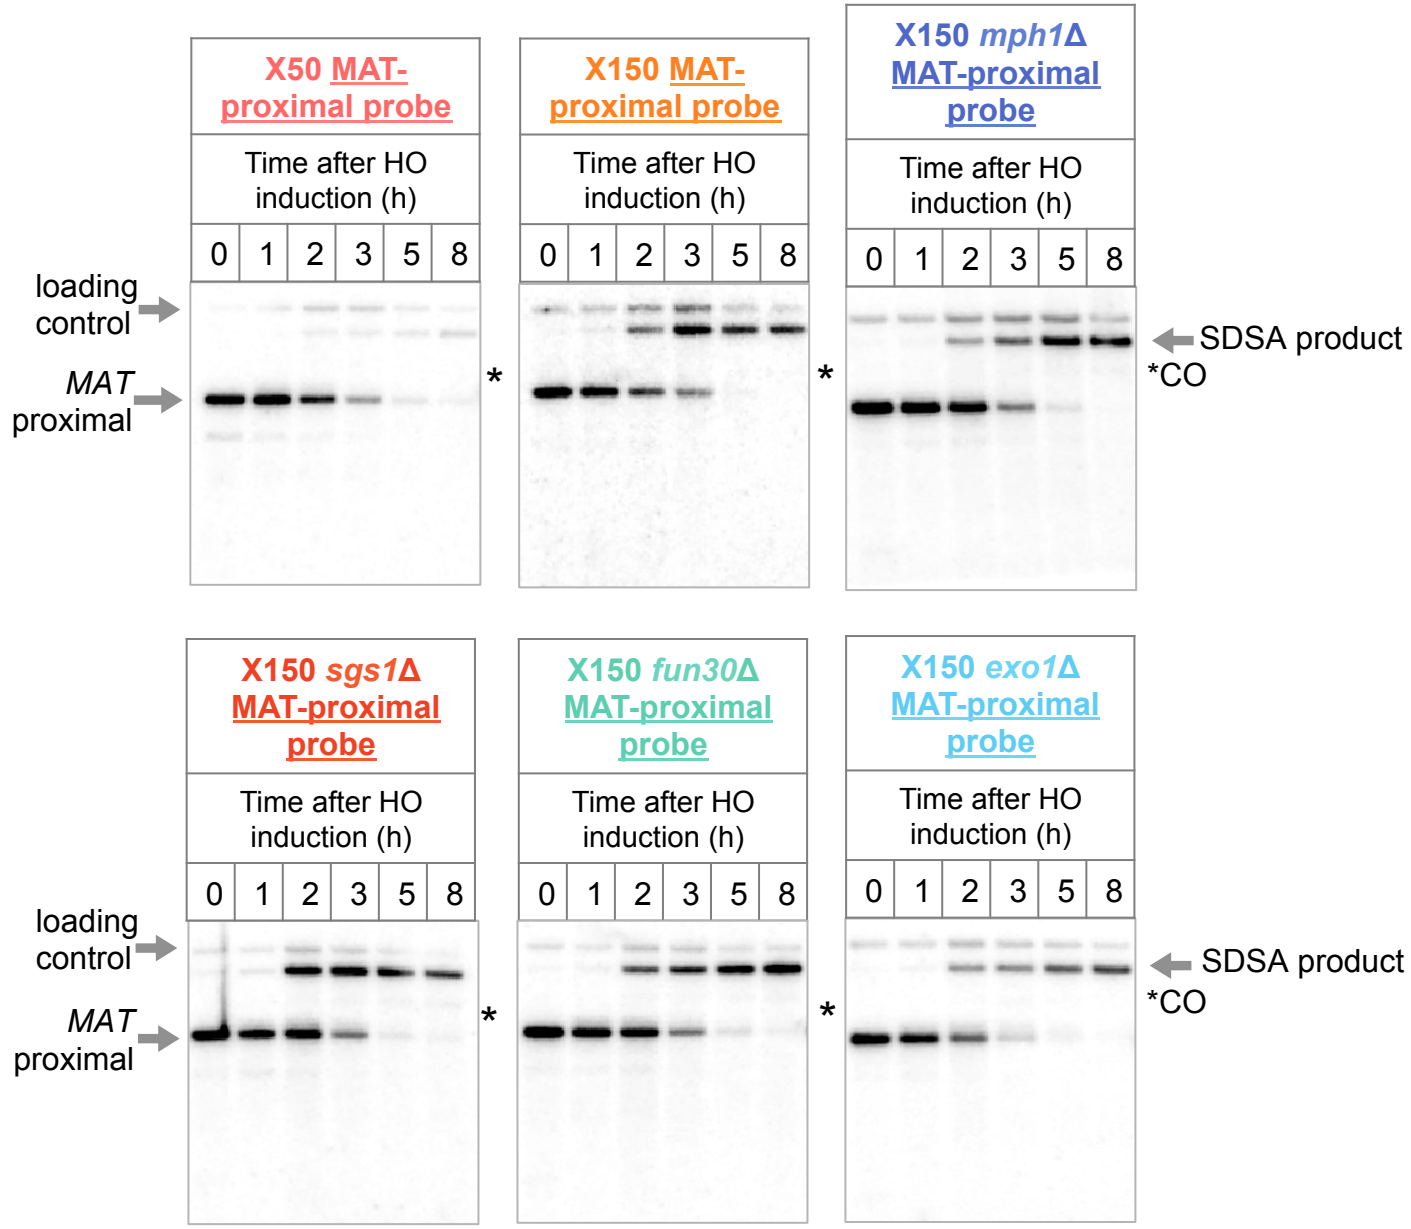

## Supplemental Information

### Supplemental Figure Legends

*Figure S1, related to main Figure 2.* Kinetics of repair in the absence of RE. (A) Southern blots showing kinetics of repair in RE<sup>+</sup> and *reΔ*. DNA was digested with AseI and probed with a *MAT* distal fragment. (B) Rad51 ChIP signal at the *MAT* locus in RE<sup>+</sup> and *reΔ* cells. The top panel is a schematic showing Rad51 nucleoprotein filament formation at DSB. Circles represent Rad51 protein, and arrows indicate the position of primers used for qPCR analysis. The bottom panels show quantification of the PCR product as a function of time following HO induction. IP signal from an independent *ARG5,6* locus was used to normalize for input DNA in the ChIP assay. (C) Representative Rad53 Western blot analysis in whole cell extracts of Z2216 *reΔ* and Z148 *reΔ* cells during DSB repair. Phosphorylated Rad53 (Rad53-ppp) migrates slowly compared to unphosphorylated Rad53.

*Figure S2, related to main Figure 4.* Schematic showing how BIR would result in an inviable outcome in this current intra-chromosomal repair system.

*Figure S3, related to main Figure 4 and Figure 6.* (A) Graph showing quantitative densitometric analysis of repair Southern blots for X150 *pol32Δ*. Data is represented as ratio of SDSA product (black graph) and BIR product (unfilled graph) over total product for a given time-point, which is normalized as 1. Data represent mean ± SD ( $n = 3$ ). (B) Viability of WT and mutant WX1433 strains as denoted under the axes. Data represent mean ± SD ( $n \geq 3$ ). (C) Viability of WT and mutant X150 strains as denoted under the axes. Data represent mean ± SD ( $n \geq 3$ ). No significant change was observed in the WX1433 deletion mutants (Figure S3B). Two asterisks denote that the viabilities of the WT and marked mutant strains are significantly different with  $P \leq 0.001$ . “ns” indicates that the viabilities of the two strains are not significantly different.

*Figure S4, related to main Figure 6.* (A) Representative Southern blots showing DSB repair kinetics and products in (from left to right) X150, X150 *sgs1Δ* and X150 *mph1Δ* strains. DNA was digested with Bsp1286I and probed with a *MAT* distal fragment. (B) Graphs showing quantitative densitometric analysis of repair Southern blots shown in Figure S4A. Data is represented as ratio of SDSA product (solid color graph) and BIR product (unfilled graph) over total product for a given time-point, which is normalized as 1. Error bars represent ranges of two experiments.

*Figure S5, related to main Figure 4 and Figure 6.* (A) Representative Southern blots showing DSB repair kinetics and products in (from left to right) X150 *fun30Δ* and X150 *exo1Δ* strains. DNA was digested with Bsp1286I and probed with a *MAT* distal fragment. (B) Graphs showing quantitative densitometric analysis of repair Southern blots shown in Figure S5A. Data is

represented as ratio of SDSA product (solid color graph) and BIR product (unfilled graph) over total product for a given time-point, which is normalized as 1. Data represent mean  $\pm$  SD ( $n = 3$ ). (C) Graphs showing quantitative densitometric analysis of repair Southern blots shown in Figure S5A. The amount of product obtained from 5h time point was set to 100%. Data represent mean  $\pm$  SD ( $n = 3$ ).

*Figure S6, related to main Figure 4 and Figure 6.* Reducing non-invading X homology does not lead to GC repair resolved into COs. Southern blots showing repair in X50, X150, X150 *mph1* $\Delta$ , X150 *sgs1* $\Delta$ , X150 *fun30* $\Delta$  and X150 *exo1* $\Delta$  from top-left to bottom-right. Bsp1286I digested DNA was probed with a *MAT* proximal fragment. As resection proceeds through the Bsp1286I recognition sequence, the *MAT* proximal band disappears. Predicted size of the CO band is marked by asterisk (\*).

## Supplemental Tables

**Table S1, related to STAR Methods. Yeast Strains used in this study**

| Strain name used in this study                                                                             | Genotype                                                                                                                                                              | Lab Database name |
|------------------------------------------------------------------------------------------------------------|-----------------------------------------------------------------------------------------------------------------------------------------------------------------------|-------------------|
| Z327 (WT) RE <sup>+</sup> , RE <sup>+</sup> , WX1433 RE <sup>+</sup> , WX1433, WX1433 (WT) RE <sup>+</sup> | <i>hoΔ ade3::GAL-HO HMLα-inc MATa hmr::ADE1 bar1Δ::ADE3 nej1Δ::KANMX ade1 leu2,3-112 trp1::hisG ura3-52 thr4 lys5</i>                                                 | YAM033            |
| Z327 (WT) <i>reΔ</i> , <i>reΔ</i> , WX1433 (WT) <i>reΔ</i> , WX1433 <i>reΔ</i>                             | <i>reΔ::HPHMX</i>                                                                                                                                                     | YAM036a           |
| Z2216 RE <sup>+</sup>                                                                                      | <i>hoΔ ade3::GAL-HO HML YaΔ::NATMX-inc – 2216bpMATdistal - KANMX RE-HPHMX MATa hmr::LEU2 bar1Δ::ADE3 nej1Δ::KANMX ade1 leu2,3-112 trp1::hisG ura3-52 thr4 lys5</i>    | YAM075            |
| Z148 RE <sup>+</sup>                                                                                       | <i>MAT Z2Δ, MAT Z1Δ148bp::Cg-TRP1</i>                                                                                                                                 | YAM072            |
| Z100 RE <sup>+</sup>                                                                                       | <i>MAT Z2Δ, MAT Z1Δ100bp::Cg-TRP1</i>                                                                                                                                 | YAM121            |
| Z50 RE <sup>+</sup>                                                                                        | <i>MAT Z2Δ, MAT Z1Δ50bp::Cg-TRP1</i>                                                                                                                                  | YAM119            |
| Z35 RE <sup>+</sup>                                                                                        | <i>MAT Z2Δ, MAT Z1Δ35bp::Cg-LEU2</i>                                                                                                                                  | YAB247            |
| Z2216 <i>reΔ</i>                                                                                           | <i>hoΔ ade3::GAL-HO HML YaΔ::NATMX-inc – 2216bpMATdistal - KANMX reΔ::URA3MX MATa hmr::LEU2 bar1Δ::ADE3 nej1Δ::KANMX ade1 leu2,3-112 trp1::hisG ura3-52 thr4 lys5</i> | YAM138            |
| Z148 <i>reΔ</i>                                                                                            | <i>reΔ::HPHMX MAT Z2Δ, MAT Z1Δ148bp::Cg-TRP1</i>                                                                                                                      | YAM112            |
| Z100Z <i>reΔ</i>                                                                                           | <i>reΔ::HPHMX MAT Z2Δ, MAT Z1Δ100bp::Cg-TRP1</i>                                                                                                                      | YAM122            |
| Z50 <i>reΔ</i>                                                                                             | <i>reΔ::HPHMX MAT Z2Δ, MAT Z1Δ50bp::Cg-TRP1</i>                                                                                                                       | YAM120            |
| Z35 <i>reΔ</i>                                                                                             | <i>reΔ::HPHMX MAT Z2Δ, MAT Z1Δ35bp::Cg-TRP1</i>                                                                                                                       | YAB248            |
| X250 RE <sup>+</sup>                                                                                       | <i>MAT WΔ, MAT XΔ250bp::Cg-TRP1</i>                                                                                                                                   | YAM097            |
| X200 RE <sup>+</sup>                                                                                       | <i>MAT WΔ, MAT XΔ200bp::Cg-TRP1</i>                                                                                                                                   | YAM096            |
| X150 RE <sup>+</sup> , X150                                                                                | <i>MAT WΔ, MAT XΔ150bp::Cg-TRP1</i>                                                                                                                                   | YAM095            |
| X250 RE <sup>+</sup>                                                                                       | <i>MAT WΔ, MAT XΔ100bp::Cg-TRP1</i>                                                                                                                                   | YAM094            |
| X200 RE <sup>+</sup>                                                                                       | <i>MAT WΔ, MAT XΔ50bp::Cg-TRP1</i>                                                                                                                                    | YAM078            |
| X250 <i>reΔ</i>                                                                                            | <i>reΔ::HPHMX MAT WΔ, MAT XΔ250bp::Cg-TRP1</i>                                                                                                                        | YAM102            |
| X200 <i>reΔ</i>                                                                                            | <i>reΔ::HPHMX MAT WΔ, MAT XΔ200bp::Cg-TRP1</i>                                                                                                                        | YAM101            |
| X150 <i>reΔ</i>                                                                                            | <i>reΔ::HPHMX MAT WΔ, MAT XΔ150bp::Cg-TRP1</i>                                                                                                                        | YAM100            |
| X100 <i>reΔ</i>                                                                                            | <i>reΔ::HPHMX MAT WΔ, MAT XΔ100bp::Cg-TRP1</i>                                                                                                                        | YAM099            |
| X50 <i>reΔ</i>                                                                                             | <i>reΔ::HPHMX MAT WΔ, MAT XΔ50bp::Cg-TRP1</i>                                                                                                                         | YAM079            |
| WX1433 <i>pif1Δ</i>                                                                                        | <i>pif1Δ::URA3MX</i>                                                                                                                                                  | YAB056            |
| X150 <i>pif1Δ</i>                                                                                          | <i>MAT WΔ, MAT XΔ150bp::Cg-TRP1 pif1Δ::URA3MX</i>                                                                                                                     | YAB058            |
| X50 <i>pif1Δ</i>                                                                                           | <i>MAT WΔ, MAT XΔ50bp::Cg-TRP1 pif1Δ::URA3MX</i>                                                                                                                      | YAB057            |
| WX1433 <i>fun30Δ</i>                                                                                       | <i>fun30Δ::NATMX</i>                                                                                                                                                  | YAB068            |
| X150 <i>fun30Δ</i>                                                                                         | <i>MAT WΔ, MAT XΔ150bp::Cg-TRP1 fun30Δ::NATMX</i>                                                                                                                     | YAB070            |
| WX1433 <i>sgs1Δ</i>                                                                                        | <i>sgs1Δ::NATMX</i>                                                                                                                                                   | YAM130            |
| X150 <i>sgs1Δ</i>                                                                                          | <i>MAT WΔ, MAT XΔ150bp::Cg-TRP1 sgs1Δ::NATMX</i>                                                                                                                      | YAM129            |
| X50 <i>sgs1Δ</i>                                                                                           | <i>MAT WΔ, MAT XΔ50bp::Cg-TRP1 sgs1Δ::NATMX</i>                                                                                                                       | YAM128            |



|                                   |                                                                              |        |
|-----------------------------------|------------------------------------------------------------------------------|--------|
| X150 <i>sgs1Δ</i> + <i>sgs1hd</i> | <i>MAT WΔ, MAT XΔ150bp::Cg-LEU2 sgs1Δ::NATMX pSJ23 (sgs1hd – TRP1)</i>       | YAB233 |
| X150 <i>sgs1Δ</i> + empty plasmid | <i>MAT WΔ, MAT XΔ150bp::Cg-LEU2 sgs1Δ::NATMX pRS414 (TRP1 empty plasmid)</i> | YAB245 |
| WX1433 <i>exo1Δ</i>               | <i>exo1Δ::HPHMX</i>                                                          | YAB204 |
| X150 <i>exo1Δ</i>                 | <i>MAT WΔ, MAT XΔ150bp::Cg-TRP1 exo1Δ::HPHMX</i>                             | YAB206 |
| X150 <i>exo1Δ fun30Δ</i>          | <i>MAT WΔ, MAT XΔ150bp::Cg-TRP1 exo1Δ::HPHMX fun30Δ::NATMX</i>               | YAB213 |
| X150 <i>sgs1Δ fun30Δ</i>          | <i>MAT WΔ, MAT XΔ150bp::Cg-TRP1 sgs1Δ::URA3MX fun30Δ::NATMX</i>              | YAB216 |
| X150 <i>sgs1Δ EXO1</i> O/E        | <i>MAT WΔ, MAT XΔ150bp::Cg-TRP1 sgs1Δ::NATMX GAL::EXO1-LEU2</i>              | YAB214 |
| X150 <i>fun30Δ EXO1</i> O/E       | <i>MAT WΔ, MAT XΔ150bp::Cg-TRP1 fun30Δ::NATMX GAL::EXO1-LEU2</i>             | YAB215 |
| WX1433 <i>mph1Δ</i>               | <i>mph1Δ::NATMX</i>                                                          | YAM133 |
| X150 <i>mph1Δ</i>                 | <i>MAT WΔ, MAT XΔ150bp::Cg-TRP1 mph1Δ::NATMX</i>                             | YAM132 |
| X150 <i>mph1Δ sgs1Δ</i>           | <i>MAT WΔ, MAT XΔ150bp::Cg-TRP1 mph1Δ::HPHMX sgs1Δ::NATMX</i>                | YAB311 |
| WX1433 <i>pol32Δ</i>              | <i>pol32Δ::HPHMX</i>                                                         | YAM136 |
| X150 <i>pol32Δ</i>                | <i>MAT WΔ, MAT XΔ150bp::Cg-TRP1 pol32Δ::HPHMX</i>                            | YAM135 |
| X50 <i>pol32Δ</i>                 | <i>MAT WΔ, MAT XΔ50bp::Cg-TRP1 pol32Δ::HPHMX</i>                             | YAM134 |
| WX1433 <i>RAD51</i> O/E           | <i>ADH1::RAD51-LEU2</i>                                                      | YAB249 |
| X150 <i>RAD51</i> O/E             | <i>MAT WΔ, MAT XΔ150bp::Cg-TRP1 ADH1::RAD51-LEU2</i>                         | YAM123 |
| X50 <i>RAD51</i> O/E              | <i>MAT WΔ, MAT XΔ50bp::Cg-TRP1 ADH1::RAD51-LEU2</i>                          | YAM124 |
| Z50 <i>RAD51</i> O/E              | <i>MAT Z2Δ, MAT Z1Δ50bp::Cg-TRP1 ADH1::RAD51-LEU2</i>                        | YAB244 |

**Table S2, related to STAR Methods. Primers used in this study\***

| Name                   | 5' → 3' sequence                                                           | Comments                                                                                                           |
|------------------------|----------------------------------------------------------------------------|--------------------------------------------------------------------------------------------------------------------|
| AM5                    | AAACTCTTCTCAAACCAAATTGCGCAAGGATTG<br>ATTCAGTACAATTATGcggatccccgggtaattaa   | to delete <i>RE</i> with <i>HPHMX</i>                                                                              |
| AM6                    | CCTAGAATTTGGAATTGGATAATTTAACTCTTTAG<br>AATATAACATCTACCgaattcgagctcgtttaaac |                                                                                                                    |
| p1 (MATZp2)            | CGTCTTGCTCTTGTTCCCAA                                                       | to detect Rad51 at <i>HML</i>                                                                                      |
| p2 (HMLp3)             | AGTAGCTTTCGGATGGCACA                                                       |                                                                                                                    |
| p5 (MATZp2)            | CGTCTTGCTCTTGTTCCCAA                                                       | to detect Rad51 at <i>MAT</i>                                                                                      |
| p6 (MATDp8)            | CGCATGGGCAGTTTACCTTT                                                       |                                                                                                                    |
| Arg5,6p1               | CAAGGATCCAGCAAAGTTGGGTGAAGTATGGTA                                          | normalization for qRT-PCR                                                                                          |
| Arg5,6p2               | GAAGGATCCAAATTTGTCTAGTGTGGGAACG                                            |                                                                                                                    |
| p3 (MATp11)            | GGTTAAGATAAGAACAAAGAATGATGCT                                               | primer extension assay (for all strains except Z2216 strains).                                                     |
| p4 (HOCSp3)            | GACAAAATGCAGCACGGAAT                                                       |                                                                                                                    |
| p3 (AM43)              | GCATATTGTGGAAATCAAAGATA                                                    | primer extension assay for Z2216 strains                                                                           |
| p4 (HOCSp3)            | GACAAAATGCAGCACGGAAT                                                       |                                                                                                                    |
| MatZ2+71               | ATTGGCTATACGGGACGG                                                         | to make <i>MAT</i> distal Southern blot probe                                                                      |
| MatZ2+493              | CTTAGCTTGTACCAGAGG                                                         |                                                                                                                    |
| Act15'-89              | TCTTCCCATCTATCGTCGGTAGAC                                                   | to make <i>ACT1</i> Southern blot probe                                                                            |
| Act13'-807             | GGTCAATACCGGCAGATTCC                                                       |                                                                                                                    |
| AM72                   | CTTATCGATACCGTCGACCTCG                                                     | to make <i>MAT</i> proximal Southern blot probe                                                                    |
| bud5+1574              | ACGACGACTTTTAGGCGC                                                         |                                                                                                                    |
| YS001 5' ADE2 500bp p1 | TCATGTATAAATTGGTGCGTAAAATCG                                                | normalization for agarose gel quantification of PCR                                                                |
| YS002 3' ADE2 500bp p2 | GTTACTGGATATGTATGTATGTATAATAAGTGATC                                        |                                                                                                                    |
| AM65                   | ttgtacattggccttatagagtgtggtcgtggcggaggtgtttatcttTCGAG<br>GTCGACGGTATC      | to make Z148 strains by deleting partial <i>MAT</i> Z1/Z2 with <i>Cg-TRP1</i> using plasmid pYO2242.               |
| AM78                   | tcaagatgtttatggtaagataagaacaaagaatgatgctaagaattgaCGCT<br>CTAGAACTAGTGGATC  |                                                                                                                    |
| AM80                   | cgcaacagtataatttataaacctggttttggtttgtagagtggtgaTCGAG<br>GTCGACGGTATC       | used with AM78 to make Z50 strains by deleting partial <i>MAT</i> Z1/Z2 with <i>Cg-TRP1</i> using plasmid pYO2242. |
| AM104                  | gacaaaatgcagcacggaatatgggactactcgcgcaacagtataatTTTCG<br>AGGTCGACGGTATC     | used with AM78 to make Z35 strains by deleting partial <i>MAT</i> Z1/Z2 with <i>Cg-LEU2</i> using plasmid pYO2241. |

|      |                                                                             |                                                                                                                       |
|------|-----------------------------------------------------------------------------|-----------------------------------------------------------------------------------------------------------------------|
| AM79 | cgaataattatgctgaagtacgtgggtgacggatattgggaagatgtgttgTCGA<br>GGTCGACGGTATC    | used with AM78 to make Z100 strains by deleting partial <i>MAT</i> Z1/Z2 with <i>Cg-TRP1</i> using plasmid pYO2242.   |
| AM67 | gatacttttaatgtgtctcactatcttccaataaagactctaccagatTCGAG<br>GTCGACGGTATC       | to make X50 strains by deleting <i>MAT</i> W and partial X with <i>Cg-TRP1</i> using plasmid pYO2242.                 |
| AM68 | aataaaaagctcttttctatttctgtgtaattacctaagttaccagagagtCGCTC<br>TAGAACTAGTGGATC |                                                                                                                       |
| AM74 | ctaggccaacaaaaaccgtaagattagtgatgaggagaagaagtgttcCG<br>CTCTAGAACTAGTGGATC    | used with AM67 to make X150 strains by deleting <i>MAT</i> W and partial X with <i>Cg-TRP1</i> using plasmid pYO2242. |
| AM73 | tgaacaacagaagaagaagtgaattaaggatattaggattcttctcCGCT<br>CTAGAACTAGTGGATC      | used with AM67 to make X100 strains by deleting <i>MAT</i> W and partial X with <i>Cg-TRP1</i> using plasmid pYO2242. |
| AM75 | caaacaacatctcaactcactactaccattactgtattactcaaagaaatgCGCT<br>CTAGAACTAGTGGATC | used with AM67 to make X200 strains by deleting <i>MAT</i> W and partial X with <i>Cg-TRP1</i> using plasmid pYO2242. |
| AM76 | ggcgagcatagaaaacgatagaagtaattatcaacttacacagaaaataaCGC<br>TCTAGAACTAGTGGATC  | used with AM67 to make X250 strains by deleting <i>MAT</i> W and partial X with <i>Cg-TRP1</i> using plasmid pYO2242. |

\*Primer sequences for other gene deletions are available upon request. All gene disruptions/alterations were confirmed by PCR.
